# Supplementary material
Source: publisher figshare collection journal article supplement (https://asha.figshare.com/articles/dataset/_/12860939)
Supplement: Supplementary file 1 [file 1]

**Supplemental Material S2.** POSHA–S, POSHA–Ob, and POSHA–MI demographic and attitudinal ratings for three triads of samples: 500 randomly selected respondents from the stuttering, obesity, and mental illness databases; 163 respondents who filled out early versions of all three POSHAs, and 50 U.S. respondents who filled out an earlier prototype of the POSHA–S as well as 50 U.S. respondents who filled out revised versions of the POSHA–Ob, and POSHA–MI.

|                               | Stuttering Database | Obesity Database | Mental Illness Database | Stuttering Same Respondents | Obesity Same Respondents | Mental Illness Same Respondents | Stuttering USA | Obesity USA | Mental Illness USA |
|-------------------------------|---------------------|------------------|-------------------------|-----------------------------|--------------------------|---------------------------------|----------------|-------------|--------------------|
| Column                        | 1                   | 2                | 3                       | 4                           | 5                        | 6                               | 7              | 8           | 9                  |
| <b>Demographic Variables</b>  |                     |                  |                         |                             |                          |                                 |                |             |                    |
| Number                        | 500                 | 500              | 500                     | 163                         | 163                      | 163                             | 50             | 50          | 50                 |
| Age                           | 34.0                | 35.9             | 33.6                    |                             | 30.8                     |                                 | 49.9           | 43.0        | 43.0               |
| Education                     | 14.1                | 14.2             | 14.8                    |                             | 14.3                     |                                 | 15.8           | 15.5        | 15.5               |
| Income Score                  | 0                   | 13               | 7                       |                             | 9                        |                                 | 14             | 4           | 4                  |
| Male                          | 31%                 | 35%              | 37%                     |                             | 31%                      |                                 | 30%            | 40%         | 39%                |
| Female                        | 67%                 | 65%              | 59%                     |                             | 65%                      |                                 | 70%            | 60%         | 59%                |
| Single                        | 33%                 | 25%              | 58%                     |                             | 58%                      |                                 | 6%             | 22%         | 24%                |
| Married                       | 51%                 | 75%              | 42%                     |                             | 42%                      |                                 | 78%            | 78%         | 78%                |
| Parent                        | 44%                 | 4%               | 0%                      |                             | —                        |                                 | 8%             | 70%         | 71%                |
| Student                       | 30%                 | 0%               | 11%                     |                             | —                        |                                 | 18%            | 8%          | 8%                 |
| <b>Work Status</b>            |                     |                  |                         |                             |                          |                                 |                |             |                    |
| Working                       | 56%                 | 68%              | 57%                     |                             | 54%                      |                                 | 62%            | 90%         | 88%                |
| Not working                   | 10%                 | 11%              | 17%                     |                             | 29%                      |                                 | 4%             | 6%          | 6%                 |
| Retired                       | 4%                  | 5%               | 3%                      |                             | 5%                       |                                 | 24%            | 0%          | 0%                 |
| <b>Self-Identification</b>    |                     |                  |                         |                             |                          |                                 |                |             |                    |
| Multilingual                  | 49%                 | 55%              | 40%                     |                             | 37%                      |                                 | 18%            | 22%         | 22%                |
| Intelligent                   | 35%                 | 15%              | 31%                     |                             | 29%                      |                                 | 48%            | 40%         | 39%                |
| Left handed                   | 7%                  | 7%               | 5%                      |                             | 6%                       |                                 | 4%             | 12%         | 12%                |
| Obese                         | 11%                 | 9%               | 10%                     |                             | 11%                      |                                 | 14%            | 10%         | 10%                |
| Mentally Ill                  | 3%                  | 1%               | 3%                      |                             | 0%                       |                                 | 6%             | 2%          | 2%                 |
| Stuttering                    | 3%                  | 1%               | 2%                      |                             | 1%                       |                                 | 2%             | 2%          | 2%                 |
| <b>No Persons Known</b>       |                     |                  |                         |                             |                          |                                 |                |             |                    |
| Intelligent                   | 4%                  | 1%               | 1%                      |                             | 2%                       |                                 | 2%             | 0%          | 0%                 |
| Left handed                   | 11%                 | 10%              | 2%                      |                             | 3%                       |                                 | 2%             | 6%          | 6%                 |
| Obese                         | 10%                 | 11%              | 3%                      |                             | 4%                       |                                 | 2%             | 8%          | 8%                 |
| Mentally Ill                  | 31%                 | 50%              | 34%                     |                             | 50%                      |                                 | 14%            | 34%         | 33%                |
| Stuttering                    | 27%                 | 31%              | 23%                     |                             | 37%                      |                                 | 10%            | 26%         | 25%                |
| <b>Health &amp; Abilities</b> |                     |                  |                         |                             |                          |                                 |                |             |                    |
|                               | 53                  | 60               | 57                      |                             |                          |                                 |                |             |                    |

|                                                     |     |     |     |     |     |     |     |
|-----------------------------------------------------|-----|-----|-----|-----|-----|-----|-----|
| Physical Health                                     | 42  | 46  | 47  | —   | 53  | 41  | 41  |
| Mental Health                                       | 54  | 68  | 60  | —   | 63  | 59  | 59  |
| Ability to Learn                                    | 57  | 68  | 65  | —   | 60  | 69  | 69  |
| Ability to Speak                                    | 58  | 59  | 64  | —   | 60  | 67  | 67  |
| <b>Life Priorities</b>                              |     |     |     |     |     |     |     |
| Be Safe/Secure                                      | 80  | 91  | 93  | —   | 70  | 91  | 91  |
| Be Free                                             | 73  | 70  | 59  | —   | 65  | 58  | 58  |
| Spend Time Alone                                    | 35  | 39  | 34  | —   | 44  | 34  | 34  |
| Attend Social Events                                | 14  | -2  | -9  | —   | -9  | -9  | -9  |
| Imagine New Things                                  | 37  | 50  | 42  | —   | 21  | 43  | 43  |
| Help Less Fortunate                                 | 49  | 41  | 47  | —   | 54  | 44  | 44  |
| Have Exciting but Potentially Dangerous Experiences | -18 | -18 | -30 | —   | -33 | -31 | -31 |
| Practice My Religion                                | 22  | 23  | 35  | —   | 39  | 35  | 35  |
| Earn Money                                          | 60  | 75  | 70  | —   | 51  | 68  | 68  |
| Do Job/Duty                                         | 74  | 79  | 83  | —   | 79  | 82  | 82  |
| Get Things Done                                     | 75  | 89  | 89  | —   | 77  | 90  | 90  |
| Solve Big Problems                                  | 71  | 88  | 86  | —   | 77  | 84  | 84  |
| <b>General POSHA Ratings</b>                        |     |     |     |     |     |     |     |
| <b>Impression</b>                                   |     |     |     |     |     |     |     |
| Intelligent                                         | 58  | 66  | 65  | 71  | 50  | 45  | 45  |
| Left Handed                                         | 22  | 26  | 18  | 21  | 14  | 24  | 24  |
| Obese                                               | -14 | -21 | -21 | -11 | -20 | -28 | -28 |
| Mentally Ill                                        | -13 | -21 | -10 | -8  | -5  | -3  | 9   |
| Stuttering                                          | 3   | 2   | 7   | 11  | 11  | 9   | -3  |
| <b>Want/Have</b>                                    |     |     |     |     |     |     |     |
| Intelligent                                         | 74  | 78  | 80  | 77  | 73  | 76  | 76  |
| Left Handed                                         | -7  | 14  | -8  | -11 | -8  | 4   | 4   |
| Obese                                               | -78 | -77 | -84 | -83 | -84 | -90 | -90 |
| Mentally Ill                                        | -83 | -71 | -83 | -83 | -83 | -88 | -71 |
| Stuttering                                          | -70 | -60 | -72 | -68 | -63 | -71 | -88 |
| <b>Amount Known</b>                                 |     |     |     |     |     |     |     |
| Intelligent                                         | 31  | 37  | 42  | 34  | 29  | 36  | 36  |
| Left Handed                                         | -4  | 0   | 11  | -1  | 6   | 34  | 34  |
| Obese                                               | 4   | 20  | 18  | 14  | 27  | 16  | 16  |
| Mentally Ill                                        | -17 | -22 | -9  | -17 | 12  | -7  | -21 |
| Stuttering                                          | -17 | -20 | -16 | -22 | -13 | -21 | -7  |
| <b>Persons Known</b>                                |     |     |     |     |     |     |     |
| Intelligent                                         | -16 | -16 | -11 | -34 | —   | —   | —   |
| Left Handed                                         | -65 | -64 | -63 | -68 | —   | —   | —   |
| Obese                                               | -59 | -64 | -52 | -59 | —   | -52 | —   |
| Mentally Ill                                        | -83 | -92 | -84 | -94 | —   | —   | -80 |
| Stuttering                                          | -83 | -88 | -83 | -89 | -71 | —   | —   |

### Summary POSHA Attitude Ratings

|                              |     |     |     |     |     |     |     |     |     |
|------------------------------|-----|-----|-----|-----|-----|-----|-----|-----|-----|
| <b>Overall Score</b>         | 17  | 22  | 1   | 2   | 17  | -7  | 20  | 33  | 19  |
| <b>Beliefs</b>               | 33  | 33  | 9   | 19  | 31  | 3   | 44  | 47  | 33  |
| Traits/Personality           | 15  | 29  | 4   | 7   | 44  | -10 | 46  | 41  | 31  |
| Help                         | 24  | 49  | 21  | 2   | 46  | 27  | 14  | 51  | 36  |
| Cause                        | 32  | 16  | 12  | 18  | 10  | 14  | 52  | 43  | 35  |
| Potential                    | 62  | 38  | -3  | 47  | 22  | -21 | 63  | 52  | 31  |
| <b>Self Reactions</b>        | 1   | 12  | -6  | -15 | 3   | -17 | -3  | 19  | 6   |
| Accommodating/Helping        | 41  | 30  | 52  | 41  | 31  | 51  | 52  | 61  | 52  |
| Social Distance<br>/Sympathy | 5   | 21  | -13 | -7  | 17  | -26 | 18  | 21  | -2  |
| Knowledge                    | -34 | -5  | -52 | -68 | -32 | -66 | -33 | -33 | -51 |
| Knowledge Source             | -7  | 1   | -12 | -25 | -3  | -29 | -51 | 30  | 24  |
| <b>Other Two Attributes</b>  | -32 | -30 | -30 | -30 | -30 | -30 | -25 | -34 | -32 |
| Impression                   | -8  | -14 | -7  | -2  | -2  | -2  | -13 | -17 | -11 |
| Want/Have                    | -77 | -69 | -80 | -78 | -78 | -78 | -83 | -89 | -81 |
| Amount Known                 | -10 | -7  | -4  | -9  | -9  | -9  | 20  | 4   | -4  |

### Correlations

|                                            |      |      |      |   |   |   |   |   |   |
|--------------------------------------------|------|------|------|---|---|---|---|---|---|
| Two Other Attributes vs.<br>Beliefs        | 0.15 | 0.10 | 0.13 | — | — | — | — | — | — |
| Two Other Attributes vs.<br>Self-Reactions | 0.40 | 0.23 | 0.35 | — | — | — | — | — | — |
| Two Other Attributes vs.<br>Overall Score  | 0.34 | 0.21 | 0.29 | — | — | — | — | — | — |
