# Supplementary material
Source: publisher figshare collection journal article supplement (https://asha.figshare.com/articles/dataset/_/12860939)
Supplement: Supplementary file 2 [file 1]

**Supplemental Material S4.** Stepwise regression models for Beliefs, Self-Reactions, and Overall Scores for the POSHA–S, POSHA–Ob, and POSHA–MI. Each analysis shows statistically significant additions of variables to the model from most to least predictive potential, and these are listed below the table.

| Model                            | <i>R</i> | <i>R</i> Square | Adjusted <i>R</i> Square | Std. Error of the Estimate | <i>R</i> Square Change | <i>F</i> Change | <i>df</i> 1 | <i>df</i> 2 | Sig. <i>F</i> Change |
|----------------------------------|----------|-----------------|--------------------------|----------------------------|------------------------|-----------------|-------------|-------------|----------------------|
| <b>Stuttering Beliefs</b>        |          |                 |                          |                            |                        |                 |             |             |                      |
| Model 1                          | .222     | .049            | .046                     | 24.866                     | .049                   | 18.430          | 1           | 357         | < .001               |
| Model 2                          | .281     | .079            | .074                     | 24.506                     | .030                   | 11.560          | 1           | 356         | .001                 |
| Model 3                          | .317     | .101            | .093                     | 24.249                     | .022                   | 8.594           | 1           | 355         | .004                 |
| Model 4                          | .337     | .114            | .104                     | 24.107                     | .013                   | 5.200           | 1           | 354         | .023                 |
| Model 5                          | .357     | .128            | .115                     | 23.950                     | .014                   | 5.657           | 1           | 353         | .018                 |
| Model 6 <sup>a</sup>             | .372     | .138            | .123                     | 23.842                     | .010                   | 4.198           | 1           | 352         | .041                 |
| <b>Stuttering Self-Reactions</b> |          |                 |                          |                            |                        |                 |             |             |                      |
| Model 1                          | .421     | .177            | .175                     | 21.925                     | .177                   | 76.971          | 1           | 357         | < .001               |
| Model 2                          | .475     | .226            | .222                     | 21.298                     | .049                   | 22.323          | 1           | 356         | < .001               |
| Model 3                          | .497     | .247            | .241                     | 21.029                     | .022                   | 10.156          | 1           | 355         | .002                 |
| Model 4                          | .506     | .256            | .248                     | 20.933                     | .009                   | 4.269           | 1           | 354         | .040                 |
| Model 5                          | .516     | .267            | .256                     | 20.817                     | .010                   | 4.945           | 1           | 353         | .027                 |
| Model 6 <sup>b</sup>             | .524     | .275            | .263                     | 20.729                     | .008                   | 3.999           | 1           | 352         | .046                 |
| <b>Stuttering Overall Score</b>  |          |                 |                          |                            |                        |                 |             |             |                      |
| Model 1                          | .337     | .113            | .111                     | 18.572                     | .113                   | 45.597          | 1           | 357         | < .001               |
| Model 2                          | .401     | .161            | .156                     | 18.090                     | .048                   | 20.298          | 1           | 356         | < .001               |
| Model 3                          | .441     | .194            | .188                     | 17.752                     | .033                   | 14.654          | 1           | 355         | < .001               |
| Model 4                          | .465     | .216            | .207                     | 17.538                     | .022                   | 9.748           | 1           | 354         | .002                 |
| Model 5                          | .487     | .237            | .226                     | 17.328                     | .021                   | 9.625           | 1           | 353         | .002                 |
| Model 6                          | .501     | .251            | .238                     | 17.193                     | .014                   | 6.538           | 1           | 352         | .011                 |
| Model 7 <sup>c</sup>             | .510     | .260            | .245                     | 17.113                     | .009                   | 4.301           | 1           | 351         | .039                 |
| <b>Obesity Beliefs</b>           |          |                 |                          |                            |                        |                 |             |             |                      |
| Model 1 <sup>d</sup>             | .182     | .033            | .025                     | 17.421                     | .033                   | 3.913           | 1           | 114         | .050                 |
| <b>Obesity Self-Reactions</b>    |          |                 |                          |                            |                        |                 |             |             |                      |
| Model 1                          | .539     | .290            | .284                     | 16.427                     | .290                   | 47.079          | 1           | 115         | < .001               |
| Model 2                          | .600     | .360            | .348                     | 15.676                     | .069                   | 12.290          | 1           | 114         | .001                 |
| Model 3                          | .622     | .387            | .371                     | 15.398                     | .028                   | 5.156           | 1           | 113         | .025                 |
| Model 4 <sup>e</sup>             | .641     | .411            | .390                     | 15.167                     | .023                   | 4.464           | 1           | 112         | .037                 |
| <b>Obesity Overall Score</b>     |          |                 |                          |                            |                        |                 |             |             |                      |
| Model 1                          | .368     | .135            | .128                     | 14.145                     | .135                   | 17.983          | 1           | 115         | < .001               |

|                                      |      |      |      |        |      |        |   |     |        |
|--------------------------------------|------|------|------|--------|------|--------|---|-----|--------|
| Model 2                              | .429 | .184 | .169 | 13.803 | .048 | 6.772  | 1 | 114 | .010   |
| Model 3                              | .471 | .221 | .201 | 13.540 | .038 | 5.473  | 1 | 113 | .021   |
| Model 4                              | .499 | .249 | .222 | 13.360 | .027 | 4.064  | 1 | 112 | .046   |
| Model 5 <sup>f</sup>                 | .524 | .275 | .242 | 13.184 | .026 | 4.014  | 1 | 111 | .048   |
| <b>Mental Illness Beliefs</b>        |      |      |      |        |      |        |   |     |        |
| Model 1                              | .242 | .058 | .054 | 22.680 | .058 | 12.397 | 1 | 200 | .001   |
| Model 2                              | .308 | .095 | .085 | 22.296 | .036 | 7.953  | 1 | 199 | .005   |
| Model 3 <sup>g</sup>                 | .344 | .118 | .105 | 22.057 | .024 | 5.341  | 1 | 198 | .022   |
| <b>Mental Illness Self-Reactions</b> |      |      |      |        |      |        |   |     |        |
| Model 1                              | .548 | .300 | .297 | 19.370 | .300 | 85.836 | 1 | 200 | < .001 |
| Model 2                              | .628 | .395 | .389 | 18.058 | .095 | 31.112 | 1 | 199 | < .001 |
| Model 3                              | .650 | .423 | .414 | 17.679 | .028 | 9.623  | 1 | 198 | .002   |
| Model 4                              | .662 | .438 | .427 | 17.490 | .015 | 5.302  | 1 | 197 | .022   |
| Model 5 <sup>h</sup>                 | .672 | .452 | .438 | 17.318 | .014 | 4.934  | 1 | 196 | .027   |
| <b>Mental Illness Overall Score</b>  |      |      |      |        |      |        |   |     |        |
| Model 1                              | .456 | .208 | .204 | 17.915 | .208 | 52.482 | 1 | 200 | < .001 |
| Model 2                              | .510 | .260 | .253 | 17.353 | .053 | 14.157 | 1 | 199 | < .001 |
| Model 3                              | .543 | .295 | .285 | 16.982 | .035 | 9.783  | 1 | 198 | .002   |
| Model 4                              | .565 | .319 | .305 | 16.740 | .023 | 6.784  | 1 | 197 | .010   |
| Model 5 <sup>i</sup>                 | .576 | .332 | .315 | 16.615 | .013 | 3.956  | 1 | 196 | .048   |

Note: Following are the predictors, following a constant, in order of progressive inclusion in the nine stepwise regression analyses.

<sup>a</sup>Model 6 Predictors for Stuttering Beliefs:

Persons Known-Intelligent  
 Want/Have-Stuttering  
 Persons Known-Mentally Ill  
 Persons Known-Stuttering  
 Want/Have-Left Handed  
 Impression-Mental Illness

<sup>b</sup>Model 6 Predictors for Stuttering Self-Reactions:

Amount Known-Stuttering  
 Impression-Mental Illness  
 Persons Known-Stuttering  
 Want/Have-Stuttering

<sup>f</sup>Model 5 Predictors for Obesity Overall Score:

Persons Known-Obese  
 Persons Known-Mentally Ill  
 Amount Known-Left Handed  
 Want/Have-Intelligent  
 Amount Known-Intelligent

<sup>g</sup>Model 3 Predictors for Mental Illness Beliefs:

Amount Known-Mental Illness  
 Amount Known-Stuttering  
 Impression-Mental Illness

<sup>h</sup>Model 5 Predictors for Mental Illness Self Reactions:

- Want/Have-Mental Illness
- Persons Known-Obesity
- <sup>c</sup>Model 7 Predictors for Stuttering Overall Score:
  - Amount Known-Stuttering
  - Impression-Mental Illness
  - Persons Known-Stuttering
  - Persons Known-Intelligent
  - Want/Have-Stuttering
  - Want/Have-Mental Illness
  - Persons Known-Mentally Ill
- <sup>d</sup>Model 1 Predictor for Obesity Beliefs:
  - Want/Have-Intelligent
- <sup>e</sup>Model 4 Predictors for Obesity Self-Reactions:
  - Persons Known-Obesity
  - Amount Known-Obesity
  - Persons Known-Mentally Ill
  - Persons Known-Intelligent
- Amount Known-Mental Illness
- Persons Known-Mentally Ill
- Impression-Mental Illness
- Persons Known-Intelligent
- Want/Have-Obesity
- <sup>f</sup>Model 5 Predictors for Mental Illness Overall Score:
  - Amount Known-Mental Illness
  - Persons Known-Mentally Ill
  - Impression-Mental Illness
  - Amount Known-Stuttering
  - Persons Known-Intelligent
