# Supplementary material
Source: publisher figshare collection journal article supplement (https://asha.figshare.com/articles/dataset/_/12860939)

**Supplemental Material S3.** Subscore and overall scores for three triads of samples taking the POSHA–S, POSHA–Ob, and POSHA–MI: 500 randomly selected respondents, 163 same respondents, and 50 U.S. respondents.

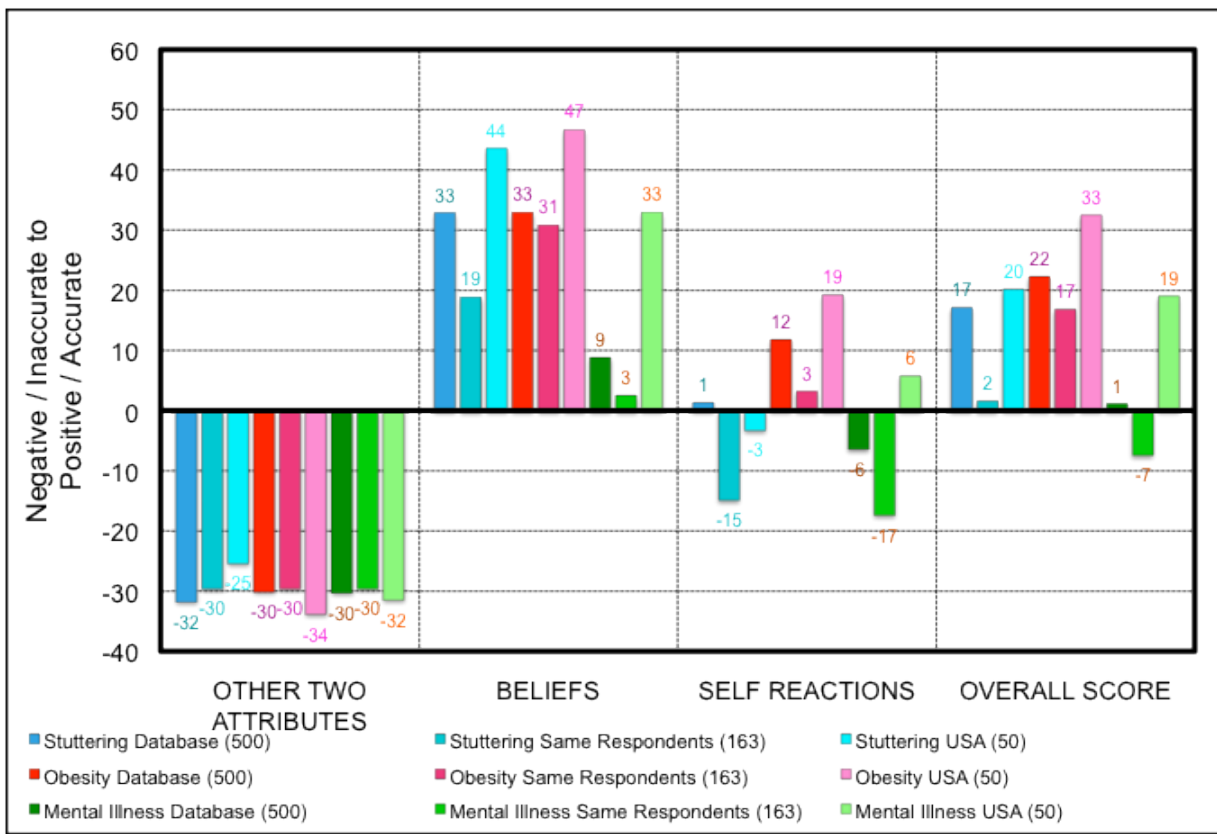

Supplement: Supplementary file 4 [file 1]
